# Supplementary material for: Size effects on rotational particle diffusion in complex fluids as probed by Magnetic Particle Nanorheology
Source: Royal Society of Chemistry journal article supplement (doi:10.1039/c9cp04083h), 2019-01-01
Supplement: c9cp04083h1.pdf [file c9cp04083h1.pdf]

## Size effects on rotational particle diffusion in complex fluids as probed by Magnetic Particle Nanorheology

Melissa Hess,<sup>ab</sup> Eric Roeben,<sup>a</sup> Patricia Rochels,<sup>a</sup> Markus Zylla,<sup>a</sup> Samira Webers,<sup>c</sup> Heiko Wende,<sup>c</sup> Annette M. Schmidt\*<sup>a</sup>

<sup>a</sup> Institute of Physical Chemistry, Chemistry Department, Universität zu Köln, Luxemburger Str. 116, 50939 Köln, Germany, email: annette.schmidt@uni-koeln.de

<sup>b</sup> Institute for Complex Systems (ICS-2), Forschungszentrum Jülich GmbH, 52428 Jülich, Germany

<sup>c</sup> Faculty of Physics and Center for Nanointegration Duisburg-Essen (CENIDE), University of Duisburg-Essen, Lotharstraße 1, D-47057 Duisburg, Germany

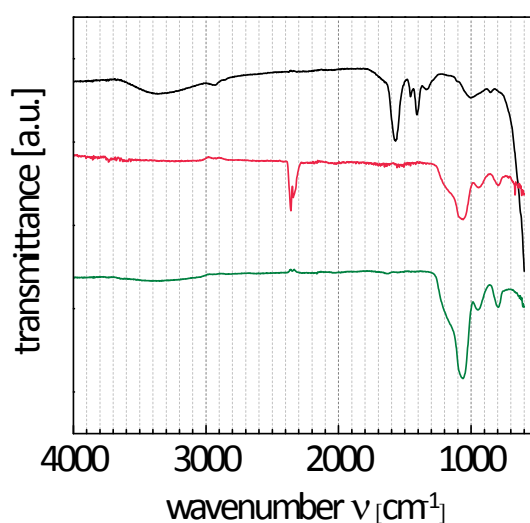

SI-Fig. 1. IR spectra of probe particles CF\_12 (black), CF@SiO<sub>2</sub>\_29 (red) and b) CF@SiO<sub>2</sub>\_42 (green).

The IR spectrum of the CF\_12 particles shows a broadened peak at  $\sim 3350\text{ cm}^{-1}$  indicating residues of water. The CH<sub>2</sub> stretch band of the PAA, at  $2900\text{ cm}^{-1}$  is only weakly observable in a broadened band.<sup>1,2</sup> At  $1571\text{ cm}^{-1}$  -  $1407\text{ cm}^{-1}$  the stretch modes of COO<sup>-</sup> are clearly visible.<sup>3</sup> For the silica coated particles, the dominant bands at  $1200\text{ cm}^{-1}$  (Si-O-Si stretching, longitudinal-optical),  $1060\text{ cm}^{-1}$  (Si-O-Si stretching, transverse-optical),  $951\text{ cm}^{-1}$  (Si-OH stretching) and  $798\text{ cm}^{-1}$  (Si-O bending) are assigned to the vibration modes of silica.<sup>4,5</sup> The bands at  $2359\text{ cm}^{-1}$  and  $2343\text{ cm}^{-1}$  are connected to the asymmetric stretching mode of gas phase CO<sub>2</sub> from the atmosphere and are neglected.<sup>6,7</sup> An important band is found close to  $600\text{ cm}^{-1}$  for all particle batches, belonging to the Me-O modes in ferrite nanoparticles.<sup>1</sup>

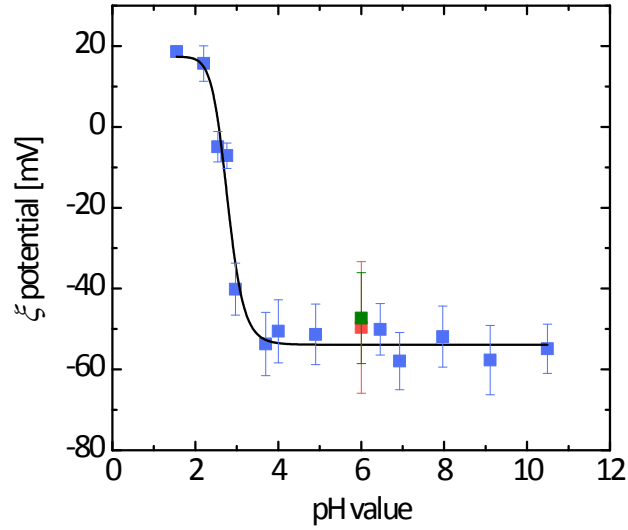

SI-Fig. 2.  $\zeta$  potential measurements in dependence on pH value for probe particles CF\_12 (blue), CF@SiO<sub>2</sub>\_29 (red) and b) CF@SiO<sub>2</sub>\_42 (green). The black line is a guide to the eye.

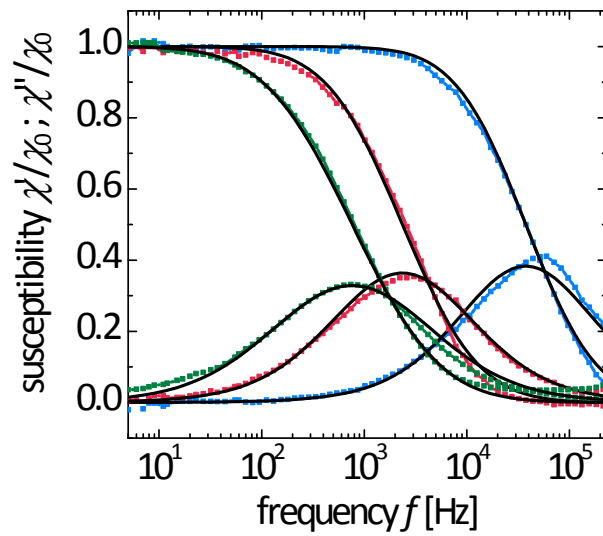

SI-Fig. 3. ACS spectra of probe particles CF\_12 (blue), CF@SiO<sub>2</sub>\_29 (red) and b) CF@SiO<sub>2</sub>\_42 (green) fitted using a single Debye relaxation process including a particle size distribution (black lines).

SI-Tab. 1. Summary of critical concentrations  $\phi_{\xi}$  ( $\xi = r_h$ ) and  $\phi_a$  ( $a = r_h$ ) for different probe particles.

| Probes                  | $\phi_{\xi}$ [v%] | $\phi_a$ [v%] |
|-------------------------|-------------------|---------------|
| CF_12                   | 4.5               | 21.9          |
| CF@SiO <sub>2</sub> _29 | 1.4               | 7.0           |
| CF@SiO <sub>2</sub> _42 | 0.9               | 4.3           |

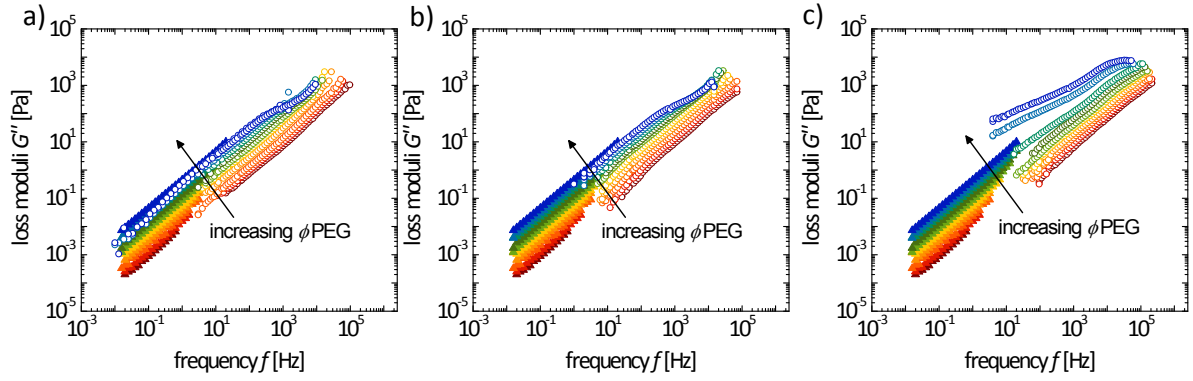

SI-Fig. 4. Loss moduli determined by macrorheology (full symbols) and nanorheology (empty symbols) in dependence on frequency  $f$  for PEG 4k aqueous solutions for probe particles a) CF@SiO<sub>2</sub>\_42, b) CF@SiO<sub>2</sub>\_29 and c) CF\_12. The volume concentration is varied between 1.8 m% - 42.0 m% (dark red:  $\phi = 1.8$  v%; red:  $\phi = 4.5$  v%; orange:  $\phi = 9.0$  v%; light orange:  $\phi = 13.5$  v%, yellow:  $\phi = 18.1$  v%, light green:  $\phi = 22.8$  v%; olive green:  $\phi = 27.5$  v%; turquoise:  $\phi = 32.3$  v%; light blue:  $\phi = 37.2$  v%; blue:  $\phi = 42.0$  v%).

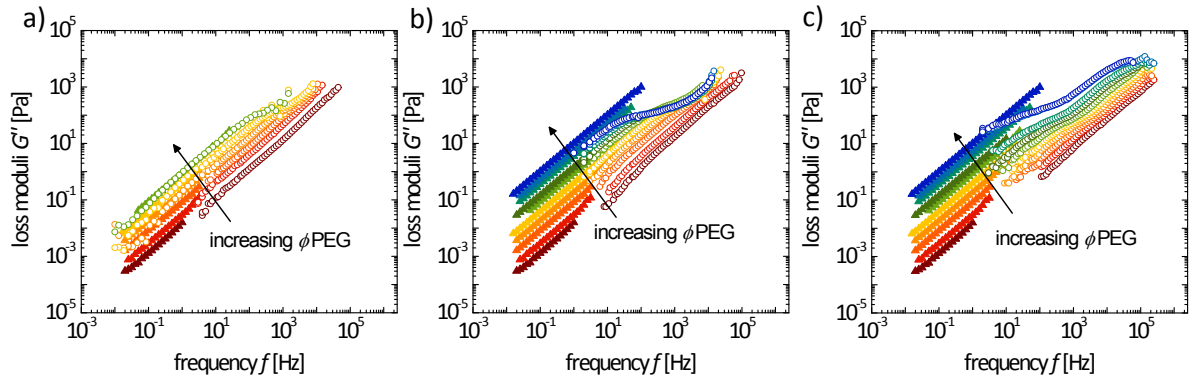

SI-Fig. 5. Loss moduli determined by macrorheology (full symbols) and nanorheology (empty symbols) in dependence on frequency  $f$  for PEG 20k aqueous solutions for probe particles a) CF@SiO<sub>2</sub>\_42, b) CF@SiO<sub>2</sub>\_29 and c) CF\_12. The volume concentration is varied between 1.8 m% - 37.2 m% (dark red:  $\phi = 1.8$  v%; red:  $\phi = 4.5$  v%; orange:  $\phi = 9.0$  v%; light orange:  $\phi = 13.5$  v%, yellow:  $\phi = 18.1$  v%, light green:  $\phi = 22.8$  v%; olive green:  $\phi = 27.5$  v%; turquoise:  $\phi = 32.3$  v%; light blue:  $\phi = 35.2$  v%; blue:  $\phi = 37.2$  v%).

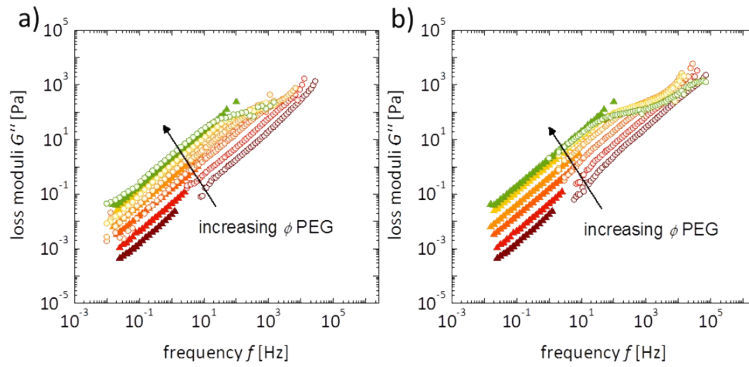

SI-Fig. 6. Loss moduli determined by macrorheology (full symbols) and nanorheology (empty symbols) in dependence on frequency  $f$  for PEG 35k aqueous solutions for probe particles a) CF@SiO<sub>2</sub>\_42, b) CF@SiO<sub>2</sub>\_29. The volume concentration is varied between 1.8 - 35.2 v% (dark red:  $\phi = 1.8$  v%; red:  $\phi = 4.5$  v%; orange:  $\phi = 9.0$  v%; light orange:  $\phi = 13.5$  v%, yellow:  $\phi = 18.1$  v%, light green:  $\phi = 22.8$  v%; olive green:  $\phi = 27.5$  v%; turquoise:  $\phi = 32.3$  v%; light blue:  $\phi = 35.2$  v%).

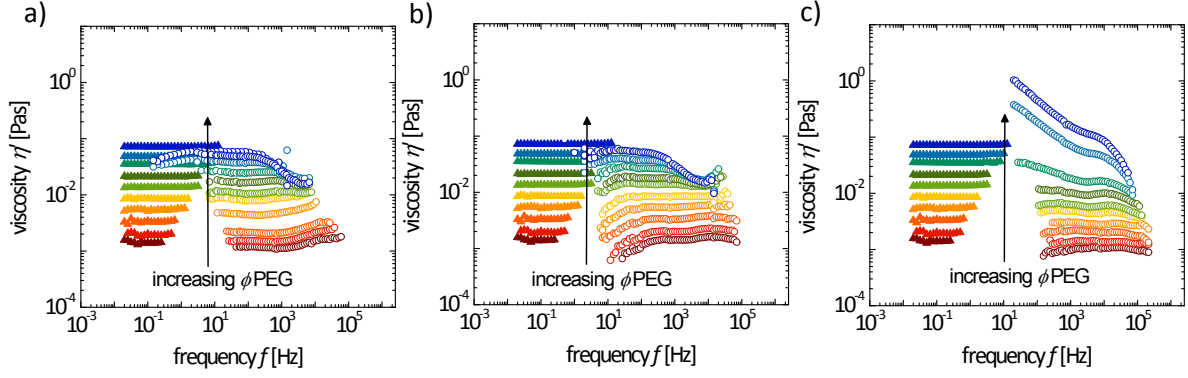

SI-Fig. 7. Viscosity determined by macrorheology (full symbols) and nanorheology (empty symbols) in dependence on frequency  $f$  for PEG 4k aqueous solutions for probe particles a) CF@SiO<sub>2</sub>\_42, b) CF@SiO<sub>2</sub>\_29 and c) CF\_12. The volume concentration is varied between 1.8 mM - 42.0 mM (dark red:  $\phi = 1.8$  v%; red:  $\phi = 4.5$  v%; orange:  $\phi = 9.0$  v%; light orange:  $\phi = 13.5$  v%, yellow:  $\phi = 18.1$  v%, light green:  $\phi = 22.8$  v%; olive green:  $\phi = 27.5$  v%; turquoise:  $\phi = 32.3$  v%; light blue:  $\phi = 37.2$  v%; blue:  $\phi = 42.0$  v%).

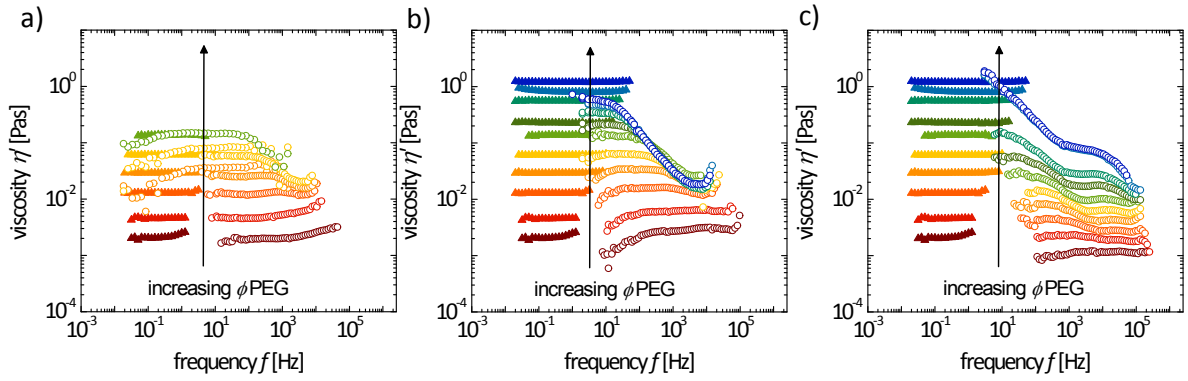

SI-Fig. 8. Viscosity determined by macrorheology (full symbols) and nanorheology (empty symbols) in dependence on frequency  $f$  for PEG 20k aqueous solutions for probe particles a) CF@SiO<sub>2</sub>\_42, b) CF@SiO<sub>2</sub>\_29 and c) CF\_12. The volume concentration is varied between 1.8 mM - 37.2 mM (dark red:  $\phi = 1.8$  v%; red:  $\phi = 4.5$  v%; orange:  $\phi = 9.0$  v%; light orange:  $\phi = 13.5$  v%, yellow:  $\phi = 18.1$  v%, light green:  $\phi = 22.8$  v%; olive green:  $\phi = 27.5$  v%; turquoise:  $\phi = 32.3$  v%; light blue:  $\phi = 35.2$  v%; blue:  $\phi = 37.2$  v%).

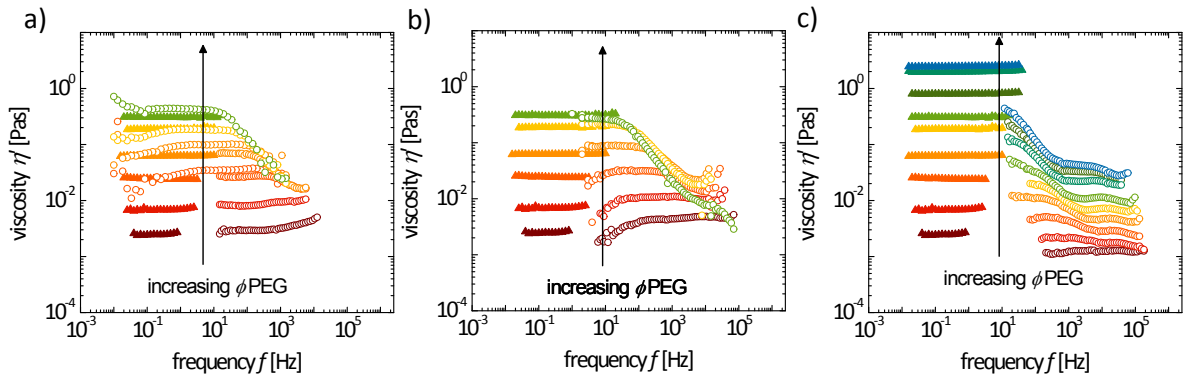

SI-Fig. 9. Viscosity determined by macrorheology (full symbols) and nanorheology (empty symbols) in dependence on frequency  $f$  for PEG 35k aqueous solutions for probe particles a) CF@SiO<sub>2</sub>\_2, b) CF@SiO<sub>2</sub>\_1 and c) CF. The volume concentration is varied between 1.8 - 35.2 v% (dark red:  $\phi = 1.8$  v%; red:  $\phi = 4.5$  v%; orange:  $\phi = 9.0$  v%; light orange:  $\phi = 13.5$  v%, yellow:  $\phi = 18.1$  v%, light green:  $\phi = 22.8$  v%; olive green:  $\phi = 27.5$  v%; turquoise:  $\phi = 32.3$  v%; light blue:  $\phi = 35.2$  v%).

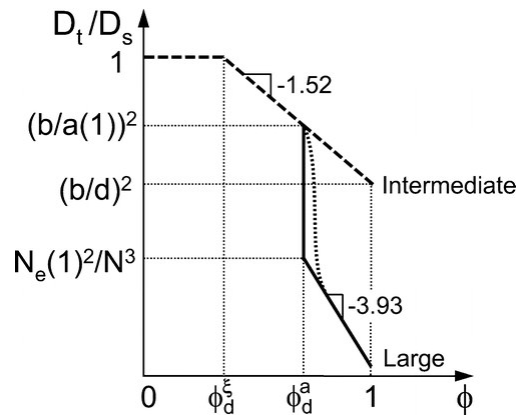

SI-Fig. 10. Concentration dependence of terminal diffusion coefficient  $D_t$  of particles in entangled athermal polymer solutions normalized by their diffusion coefficient  $D_s = k_B T / (\eta_s d)$  in pure solvent. Dashed line is for intermediate size particles ( $b < d < a(1)$ ), and solid line is for large particles ( $d > a(1)$ ). The crossover concentrations  $\phi_d^\xi$  and  $\phi_d^a$ , at which the correlation length  $\xi$  and the tube diameter  $a$  are on the order of particle size  $d$ . Dotted line corresponds to the crossover taking into account the contribution of hopping process to the particle mobility. Logarithmic scales. Reprinted with permission from L.-H. Cai, S. Panyukov and M. Rubinstein, *Macromolecules*, 2011, **44**, 7853–7863. Copyright 2011 American Chemical Society.

### References

- 1 C. Cannas, A. Musinu, A. Ardu, F. Orrù, D. Peddis, M. Casu, R. Sanna, F. Angius, G. Diaz and G. Piccaluga, *Chem. Mater.*, 2010, **22**, 3353–3361.
- 2 Q. Dai, M. Lam, S. Swanson, R.-H. R. Yu, D. J. Milliron, T. Topuria, P.-O. Jubert and A. Nelson, *Langmuir*, 2010, **26**, 17546–17551.
- 3 S. Sun, H. Zeng, D. B. Robinson, S. Raoux, P. M. Rice, S. X. Wang and G. Li, *J. Am. Chem. Soc.*, 2004, **126**, 273–279.
- 4 Y.-H. Lien and T.-M. Wu, *J. Colloid Interface Sci.*, 2008, **326**, 517–521.
- 5 T. Zhang, J. Ge, Y. Hu, Q. Zhang, S. Aloni and Y. Yin, *Angew. Chemie*, 2008, **120**, 5890–5895.
- 6 P. A. Gerakines, W. A. Schutte, J. M. Greenberg and E. F. van Dishoeck, *arXiv Prepr. astro-ph/9409076*, 1994, 1–17.
- 7 J. Vercheval, C. Lippens, C. Muller, M. Ackerman, M. Lemaitre, J. Besson, A. Girard and J. Laurent, *Ann. Geophys.*, 1986, **4**, 161–164.
